1 **Women in neotropical science: Gender parity in the 21<sup>st</sup>**  
2 **century and prospects for a post-war Colombia**

3 Camilo López-Aguirre<sup>1</sup>

4 <sup>1</sup> PANGEA Research Centre, School of Biological, Earth & Environmental Sciences,  
5 University of New South Wales, Sydney, NSW, Australia.

6 Corresponding author:

7 Camilo López-Aguirre

8 Email address: [c.lopez-aguirre@unsw.edu.au](mailto:c.lopez-aguirre@unsw.edu.au)

9

10

11

12

13

14

15

16

17

18

## 19 **Abstract**

20 An increasing amount of research has focused on studying the drivers shaping demographics  
21 in science. As a result, we now have a better idea of the current state of gender disparity in  
22 science, which remains widespread worldwide. However, fewer studies and limited data have  
23 restricted our understanding of this phenomenon in the Neotropics, a highly important region  
24 in terms of cultural and biological diversity. Despite a civil war that lasted more than five  
25 decades and produced eight million victims (half of them women), Colombia is the fifth  
26 country with the highest scientific production in Latin America and the Caribbean, as well as  
27 the second most biodiverse country in the world. In order to evaluate the status of gender  
28 parity in science in Colombia throughout the 21st century, data of science demographics was  
29 gathered covering the 2000-2017 time period. Percentage of women in science was  
30 decomposed by research area, researcher rank level and education level. Gender disparity was  
31 also estimated for changes in average age, access to scholarships for postgraduate studies,  
32 and number of doctoral graduates. Finally, using logistic function modelling, temporal  
33 projections into the future were performed, in order to estimate how long could it take to  
34 reach gender parity. Of six research fields, medical and health science is the only one to have  
35 reached gender parity (55.99%), although it is also the only one showing a steady decrease in  
36 women representation across time. On the other hand, engineering, humanities and natural  
37 sciences had the lowest percentages of female representation (19.89%, 30.02%, and 30.21%,  
38 respectively). Female researchers were on average younger than male researchers, and they  
39 also showed a decreasing presence as they move upward to more senior levels, exemplifying  
40 the 'leaky-pipeline phenomenon' common in science. More men were observed both as  
41 scholarship awardees for doctoral studies, and as doctoral graduates, indicating that obtaining  
42 a doctoral degree could be a major limiting factor for women in science. Possible drivers of  
43 these results are analysed, suggesting that a combination of lack of research funding,

44 insufficient legal framework, pre-existing biases, and poor protection of women's rights  
45 inhibits female participation in science. Based on logistic function modelling it is estimated  
46 that, without any action to change current trends, it could take between 10 (humanities) and  
47 175 (engineering) years to reach gender parity across all research areas.

## 48 **Introduction**

49 Science has grown in the diversity of fields and approaches in which it operates, to the point  
50 of including the study of the scientific endeavour itself. The last two decades have witnessed  
51 an increased interest in studying the demographics of the workforce in research and  
52 development (R&D) (Kern et al., 2015), raising concerns on topics such as inclusivity (Ceci  
53 & Williams, 2011), mental health (Evans et al., 2018), multiculturalism (Bernard &  
54 Cooperdock, 2018), gender parity (Smeding, 2012), and pay gap (Franco-Orozco & Franco-  
55 Orozco, 2018), among others. As a consequence, there are now numerous ongoing debates in  
56 an effort to improve the working conditions on all of the different branches of R&D (Stirling,  
57 2007). Historically, science has been traditionally patriarchal, favouring the proliferation of a  
58 false assumption that men are innately more well-suited for R&D. In an effort to disprove this  
59 idea and encourage higher women representation in R&D, studies have focused on  
60 understanding the prevalence of subconscious bias and unfavourable conditions for women in  
61 Science, Technology, Engineering, Mathematics and Medicine (STEMM) (Christie et al.,  
62 2017; van den Besselaar & Sandstrom, 2017). As a result, for the first time in history we have  
63 quantitative data to analyse the current state of the R&D workforce (Ceci et al., 2009;  
64 Ovseiko et al., 2016), allowing us to make more informed decisions at an individual,  
65 institutional and governmental level. Although major improvements have been accomplished  
66 on gender parity in undergraduate education, where women are increasingly studying  
67 science-related degrees (Franco-Orozco & Franco-Orozco, 2018; Valentova et al., 2017),  
68 women representation at postgraduate studies and research positions steadily decrease as they

69 pursue research-intensive careers at more senior levels (Pell, 1996). Moreover, this  
70 phenomenon has shown differential trends depending on the area, with engineering and  
71 physics consistently showing more dramatic gender disparities (Holman et al., 2018). Gender  
72 disparity in science has also been reported in a myriad of variables other than workforce  
73 representation, such as conference participation (Débarre et al., 2018; Jones et al., 2014),  
74 editorial boards' composition (Cho et al., 2014), sentiment towards science communicators  
75 (Amarasekara & Grant, 2018), grant success rate (Ley & Hamilton, 2008; Pohlhaus et al.,  
76 2011; van der Lee & Ellemers, 2015), and papers' authorship (Holman et al., 2018),  
77 exemplifying the complexity of this issue. Sexual harassment has especially impacted the  
78 scientific community as reports have shown a hostile environment for women in research and  
79 academia across the globe (National Academies of Sciences, Engineering & Medicine, 2018),  
80 with several instances where senior researchers were involved in longstanding cases of sexual  
81 misconduct (Wadman, 2018).

82 According to the UNESCO Institute for Statistics (UIS), only a third of the global workforce  
83 in science are women (UNESCO Institute of Statistics, 2018). Myanmar and Bolivia are the  
84 countries with the highest percentage of women in science (83% and 63%, respectively),  
85 whereas at a regional scale Central Asia and Latin America and The Caribbean are world  
86 leaders in gender parity in science with 48% and 45% respectively (UNESCO Institute of  
87 Statistics, 2018). Nevertheless, loss of gender parity at postgraduate and more senior levels  
88 seem to be also present in these countries and regions. By 2016, a report led by the  
89 Interacademy Partnership concluded that on average women represented only 12% of the  
90 members of 69 Academies of Science worldwide (The Interacademy Partnership, 2015).  
91 Science academies in Latin America and The Caribbean had the highest women  
92 representation (17%) followed by North America (15%) and Central and Eastern Europe  
93 (13%). Female researchers have also been found to be less internationally mobile, less likely

94 to participate on international research collaborations, and less likely to publish papers as first  
95 authors, especially on high impact journals (Elsevier, 2015). Projections on authorship in  
96 scientific publishing suggest that it could take more than 100 years to reach gender parity in  
97 areas such as statistics and physics (Holman et al., 2018). Widespread gender disparity in  
98 science is in conflict with findings indicating that research impact is not gender-related, and  
99 that female researchers represent a larger proportion of interdisciplinary research outputs  
100 (Elsevier, 2015). Significant efforts to promote gender parity include the creation of  
101 institutions such as the L’Oreal-UNESCO For Women in Science program established in  
102 1998, the Athena SWAN accreditation program established in 2005 by the British Equality  
103 Challenge Unit, and the Science in Australia Gender Equity (SAGE) established in 2015 as a  
104 partnership between the Australian Academy of Science and the Australian Academy of  
105 Technology and Engineering.

106 Despite all these efforts, a major impediment to the implementation of policies that promote  
107 gender parity is the lack of information on the extent and magnitude of gender disparity in  
108 science at local scales, especially in nations with low R&D expenditure. Only until recently,  
109 institutions in countries with low R&D expenditure have started meaningful efforts to  
110 establish a baseline understanding of the prevalence of gender disparity (Franco-Orozco &  
111 Franco-Orozco, 2018; Valentova et al., 2017), limiting our understanding of the historical  
112 trajectories of women participation in science.

113 Regardless of Latin America’s relatively good performance in global indexes of gender parity  
114 in science, Latin American female researchers still face many challenges when pursuing a  
115 career in science (Daza & Bustos, 2008; Franco-Orozco & Franco-Orozco, 2018; Valentova  
116 et al., 2017). Within the Latin American context, over the last couple of decades most of the  
117 scientific output was produced by five countries: Brazil, Mexico, Argentina, Chile and  
118 Colombia (Scimago, 2018). According to the Scimago Country Rankings, of all the scientific

119 publications authored by researchers in Latin America from 1996-2017, 88.37% was  
120 produced between these five countries (Scimago, 2018). Despite these five countries  
121 representing the scientific powerhouse of Latin America, most of them suffer from lack of  
122 funding (Brazil being the only one with a R&D expenditure >1% of GDP) (World Bank,  
123 2018), gender disparity (Argentina being the only one that has achieved gender parity)  
124 (UNESCO Institute of Statistics, 2018), and gender pay gap (Franco-Orozco & Franco-  
125 Orozco, 2018). A recent study evaluating women participation in scientific publishing  
126 worldwide over the last decade found that none of these five countries has reached gender  
127 parity, estimating that women participation in Argentina and Colombia will decrease, moving  
128 away from gender parity (Holman et al., 2018). Colombia's R&D expenditure has  
129 consistently stayed below 0.40% of the GDP (the lowest amongst these countries), with a  
130 steady reduction of expenditure in recent years. Science gender parity in Colombia remains  
131 elusive with women representing only 38% of researchers, and 14% of the active members of  
132 the Colombian Academy of Exact, Physical and Natural Sciences. Gender salary gap in  
133 postgraduate graduates in the last decade exceeded 30% in areas such as medical sciences and  
134 engineering (Franco-Orozco & Franco-Orozco, 2018). Nevertheless, gender parity in  
135 education in Colombia has improved since 2000 both at undergraduate and postgraduate  
136 level, where between 2011 to 2014 women represented 55, 47.7 and 38.3% of the graduates  
137 at undergraduate, masters and doctoral levels, respectively (Franco-Orozco & Franco-Orozco,  
138 2018).

139 The signing of a peace deal in 2016 to put an end to the armed conflict between the  
140 Colombian government and the Revolutionary Armed Forces of Colombia (FARC) could  
141 facilitate the reordering of national priorities (Ocampo-Peñuela & Winton, 2017; Salazar et  
142 al., 2018), providing an opportunity to improve the working conditions of women in science  
143 (Baptiste et al., 2017). The internal civil war in Colombia, the longest-lasting armed conflict

144 in the western hemisphere, left over 260,000 deaths and 7 million people displaced (Daza &  
145 Bustos, 2008; Overseas Development Institute, 2015; Oxfam International, 2017; Unidad de  
146 Víctimas, 2017). The severity of the conflict also added additional limitations to scientific  
147 efforts in Colombia (Augusto et al., 2017; Canavire-Bacarreza et al., 2018; Sierra et al.,  
148 2017). Vast regions of pristine native ecosystems remained inaccessible to researchers for 50  
149 years, risking kidnapping and assassination (Baptiste et al., 2017). The combination of  
150 limited funding and bad working conditions also created a collateral brain drain, with  
151 Colombia having one of the lowest rates of doctoral graduates in Latin America (8 per  
152 million inhabitants) (UNESCO Institute of Statistics, 2018), and a significant number of  
153 Colombian doctoral graduates residing overseas (El Tiempo, 2017). Post-conflict efforts to  
154 strengthen scientific production in Colombia have shown decisive advances, such as the  
155 Colombia BIO programme, a series of scientific expeditions inventorying unexplored  
156 ecosystems in Colombia, that have resulted in the description of over 100 species previously  
157 unknown to science (COLCIENCIAS, 2016).

158 The combination of challenges and opportunities that science in Colombia is facing  
159 reinforces the need to have a detailed (Ocampo-Peñuela & Winton, 2017), overarching  
160 perspective of the current status of gender parity in science, in order to diagnose recent trends  
161 and inform future efforts and policies that would focus on promoting the participation of  
162 women in R&D. The purpose of this study was to assess the demographics of the scientific  
163 workforce in Colombia in the last two decades. To do so, I dissected women participation in  
164 science by estimating gender parity across research fields, research rank, and training level  
165 from 2000 to 2017. Furthermore, I estimated changes in age distribution across genders and  
166 incorporated estimates of gender parity in access to education scholarships and number of  
167 postgraduate graduates. Finally, I modelled the trajectory of women participation across time  
168 in order to provide a rough prediction of the year when gender parity will be achieved at

169 different levels. Based on the local information available, and global patterns of gender parity  
170 in science, it is expected to find greater women underrepresentation in engineering-related  
171 research fields, as well as a decrease in women representation at higher education levels and  
172 more senior levels of research.

## 173 **Material and methods**

### 174 **Data acquisition**

175 Demographics data of the Colombian workforce in science was retrieved from the UNESCO  
176 Institute of Statistics (UNESCO Institute of Statistics, 2018), the Network for Science and  
177 Technology Indicators –Ibero-American and Inter-American– (RICYT, 2018), the Colombian  
178 Science and Technology Observatory (OCyT; Observatorio Colombiano de Ciencia y  
179 Tecnología) (OCyT, 2018), and the Science in Numbers data repository (SN) by the  
180 Administrative Department of Science, Technology and Innovation (COLCIENCIAS)  
181 (COLCIENCIAS, 2017). SN aggregated individual data for 39,342 researchers from the  
182 SCIENTI online platform between 2013 to 2017. SCIENTI was developed by  
183 COLCENCIAS as an online registry of CVs of individual researchers and research groups in  
184 Colombia. Demographic data was sorted based on research area, training level, researcher  
185 rank level, doctoral graduates and access to scholarship grants. Overall percentage of women  
186 in science (between 2000 and 2015) and by research field (2006 and 2015) was collected  
187 from the UIS and RICYT, respectively. Gender parity was decomposed following the OECD  
188 classification of research areas: Agricultural sciences, engineering, humanities, medical and  
189 health sciences, natural sciences and social sciences. Data for age distribution, training level  
190 and researcher rank level between 2013 and 2017 were retrieved from the SN by  
191 COLCIENCIAS. Training level was classified in five different groups: Undergraduate,  
192 diploma, masters, PhD and postdoctoral; whereas researcher rank level was classified into



193 four groups: Junior, associate, senior and emeritus. Data on gender parity in doctoral  
194 graduates was assessed based on data retrieved for 2006 to 2015 from the OCyT and RICYT.  
195 Numbers of granted scholarships by gender from 2006 to 2015 presented in this study were  
196 collated by the OCyT from different sources and retrieved from its 2016 Science and  
197 Technology Indicators report.

## 198 **Statistical analysis**

199 To test whether investment in R&D correlates with women representation in science, a linear  
200 model was used, based on data of R&D expenditure (as a percentage of GDP) gathered from  
201 the World Bank Open Data (World Bank, 2018). To build a temporal perspective of women  
202 in science in Colombia, the representation of women in science was calculated annually for  
203 each variable, and represented graphically both as a percentage, and as number of researchers  
204 for a given year. In order to test whether access to education associates with the number of  
205 female researchers in science, linear regression modelling was used to quantify the  
206 correlation between the percentage of female researchers and the percentage of female  
207 doctoral graduates across time. Finally, to project how long could it take to reach gender  
208 parity, a logistic regression model of proportion of women in science across time was used  
209 (assuming a sigmoidal relation between gender ratio and time; see Holman et al. (2018)),  
210 predicting the year in which the percentage of women reaches 50%. Using a logistic model  
211 allows for a non-linear growth rate that plateaus at a maximum value of 1, indicating in this  
212 case the complete loss of one gender (Holman et al., 2018). 95% confidence intervals were  
213 calculated based on 1,000 bootstrap iterations. All analyses were performed in R version  
214 3.3.2. Logistic modelling was performed with the glm function, and temporal projections of  
215 future proportion of women in science were performed using the predict function of the stats  
216 package.

## 217 **Results**

218 Overall, women representation in science has increased in Colombia across the 21st century.

219 Over the last 15 years, women representation grew by 4.69%, going from 33.71% by 2000, to  
220 38.40% by 2015 (Fig. 1). Raw number of researchers showed the same tendencies across  
221 genders, with three periods of increase in the number of researchers (2000-2003, 2004-2011,  
222 and 2014-2015), and two periods were the number of researchers decreased (2003-2004, and  
223 2011-2014).

224 Across research fields (Fig. 2), averaging the 2005-2015 period, medical and health sciences  
225 showed the highest percentage of female researchers (the only research field that reached  
226 gender parity), followed by social and agricultural sciences (55.99%, 44.20%, and 35.91%,  
227 respectively). Contrastingly, engineering showed the lowest average of women  
228 representation, followed by humanities and natural sciences (19.89%, 30.02%, and 30.21%,  
229 respectively). Temporal trends reveal that the humanities had the highest increase of women  
230 representation with an increase of 13.85% between 2005 and 2015 (Fig. 2C). Natural sciences  
231 and engineering also showed an increase in women representation for the same time period  
232 (7.34% and 4.28%, respectively; Fig. 2B and E). Agricultural and social sciences showed  
233 almost no change across time (0.22%), reflecting temporal unsteadiness in agricultural  
234 sciences where women participation grew initially, and decreased subsequently, and temporal  
235 invariability in social sciences, ranging between 43.01 and 46.16% (Fig. 2A and F). Despite  
236 having reached gender parity, medical and health science is the only field showing a temporal  
237 decrease in women representation, losing 4.94% between 2005 and 2015 (Fig. 2D).

238 Between 2013 and 2017, ages 25-45 represented more than half of researchers across  
239 genders, with ages 35-40 being the most frequent (Fig. 3). Average age of researchers in  
240 Colombia has decreased for both genders between 2013 and 2017, women having the lowest

241 average (44.39 for women and 45.49 for males). Age of female and male researchers  
242 decreased by 2.24 (46.06 in 2013 to 43.82 in 2017) and 2.19 years (47.16 in 2013 to 44.97 in  
243 2017), respectively. Lowest age recorded for SCIENTI-registered individuals was lower for  
244 males (15-20) than females (20-25). Similarly, Highest age recorded for SCIENTI-registered  
245 individuals was higher for males (90-95) than females (80-85).

246 Proportion of training level of Colombian researchers in the SCIENTI platform showed  
247 similar patterns for both genders (Fig. 4). Across time, doctoral degrees were the most  
248 abundant, representing more than half of researchers, followed by master's degrees (20 to  
249 40%), postdoctoral positions (5 to 12%), diplomas and undergraduate (both under 5%).  
250 Between 2013 and 2014, percentage of researchers of both genders with a doctoral degree  
251 dropped on average by 10%, whereas researchers with master's degrees increased  
252 approximately by the same amount. Furthermore, the proportion of researchers with doctoral  
253 degrees was higher for males than for females, and the proportion of researchers with  
254 master's degrees was higher for females than for males. Researchers with postdoctoral-level  
255 training was higher for males than females.

256 Women were underrepresented across researcher rank levels and across time, with a marked  
257 widening of the gender gap at more senior research rank level (Fig. 5). Averaging the 2013-  
258 2017 period, women represented 37.72%, 35.05%, 25.96%, and 21.51% of junior, associate,  
259 senior and emeritus researchers, respectively. Women representation has increased across all  
260 rank levels in the time period analysed, with the highest rates of increase in the junior  
261 (6.03%) and emeritus (2.49%) levels, followed by the senior (1.13%) and associate (0.98%)  
262 researcher rank levels. The only decrease in the number of researchers was evident for male  
263 junior researchers between 2013 and 2014 (Fig. 5A). Data for the emeritus rank level was  
264 lacking for 2013 and 2014 (Fig. 5D).

265 Women representation in doctoral graduates in Colombia between 2006 and 2015 remained  
266 below parity across research areas (Fig. 6). Medical sciences had the highest average  
267 percentage of female doctoral graduates (48.65%), next to social (43.20%), agricultural  
268 (36.79%), natural (35.98%), humanities (35.03%), and engineering sciences (25.71%). The  
269 highest increase in the proportion of female doctoral graduates was found in the medical  
270 (27.77%, Fig. 6D), agricultural (16.92%, Fig. 6A), and social sciences (12.68%, Fig. 6F).  
271 Contrarily, humanities (2.95%), engineering (3.29%), and natural sciences (6.86%) showed  
272 the lowest increase in the proportion of female doctoral graduates (Fig. 6B-C,E).

273 Individual linear regressions showed no significant correlation between the increase in female  
274 doctoral graduates and the overall percentage of female researchers across research areas  
275 (Table 1). From 2006 to 2015, access to scholarships for postgraduate studies showed higher  
276 women representation for master's degrees (49.10%, Fig. 7A) than for doctoral degrees  
277 (40.46%, Fig. 7B). However, women representation in scholarships for doctoral studies had  
278 the highest increase (4.06%), compared to master's degrees (3.30%).

279 For the 2000 to 2015 period, a positive and statistically significant correlation was found  
280 between the percentage of women in science and the percentage of GDP invested in R&D ( $p$   
281  $< 0.001$ ,  $r^2 = 0.769$ ). Based on logistic function modelling, the projections of future women  
282 representation in science predict that gender parity in the science workforce in Colombia  
283 could take up to 50 years (Fig. 8A). Decomposed based on research field, projections indicate  
284 that gender parity can take from three years (humanities) to more than 200 years  
285 (engineering). Medical sciences represent the only scenario where projections indicate a  
286 decrease in women representation. Years until gender parity in access to scholarships for  
287 postgraduate studies could range from two (social and agricultural) to 50 years (engineering),  
288 with the exceptional case of the humanities, where women representation is predicted to  
289 decrease (Fig. 8B). Finally, temporal projections to gender parity across researcher rank

290 levels suggested that the junior rank could be first to reach gender parity, followed by  
291 emeritus, associate and senior ranks, where estimated years to parity range from five to 90  
292 years (Fig. 8C). Raw data is available as a supplement.

## 293 **Discussion**

294 This study represents the more comprehensive study of the status of gender parity in science  
295 in Colombia in the 21st century (Daza & Bustos, 2008), providing a diagnosis of the recent  
296 trends of women representation across research fields, researcher ranks and education level,  
297 with some estimates of future temporal projections to gender parity. The analyses performed  
298 in this study represent to the best of my knowledge the first quantitative study examining the  
299 official data gathered by COLCIENCIAS and made freely available through the SCIENTI  
300 platform starting from 2015 (COLCIENCIAS, 2017). This study also builds on previous  
301 results that have helped elucidate the reality of gender pay gap (Franco-Orozco & Franco-  
302 Orozco, 2018), access to education and scholarships in Colombia. Given the scarcity of  
303 similar studies examining gender parity in science for the Latin America and the Caribbean  
304 region, the current study also helps to inform the regional context of women in science,  
305 associating it with other recent studies in Colombia and Brazil (Franco-Orozco & Franco-  
306 Orozco, 2018; Valentova et al., 2017).

307 The results presented here show widespread lack of gender parity and underrepresentation of  
308 women in science in Colombia across the 21st century, informing previous analyses that  
309 reported an extensive gender pay gap in science-related work fields (Franco-Orozco &  
310 Franco-Orozco, 2018). Following similar trends found for other countries, the lowest level of  
311 women representation was found in engineering, an area heavily dominated by implicit  
312 gender stereotypes, followed by the humanities and natural sciences (Ceci & Williams, 2011;  
313 Ceci et al., 2009; Christie et al., 2017; Franco-Orozco & Franco-Orozco, 2018; Meyer et al.,

314 2015; Valentova et al., 2017). Gender inequality in the humanities has been reported in  
315 salaries and tenure promotion in the US, showing a lack of correlation with productivity and  
316 pointing to subconscious gender bias as a possible influencing factor. However, the study of  
317 gender inequality in the humanities remains scarce, highlighting the need for increased  
318 research efforts. Recently, gender disparity in the natural sciences has been increasingly  
319 studied, providing evidence of gender differences in the length and tone of recommendation  
320 letters (Dutt et al., 2016), participation at scientific events (Débarre et al., 2018; Jones et al.,  
321 2014), and representation in editorial boards (Cho et al., 2014). In Colombia, previous studies  
322 have provided evidence of a gender pay gap in the areas aforementioned, both for  
323 undergraduate and postgraduate graduates (Franco-Orozco & Franco-Orozco, 2018).  
324 Temporal trends in the gender gap in Colombia followed similar trends found in other  
325 countries (Christie et al., 2017; Ramakrishnan et al., 2014; Valentova et al., 2017; van den  
326 Besselaar & Sandstrom, 2017; van der Lee & Ellemers, 2015). The decrease in women  
327 representation in medical and health science contrasts with the fact that it was the only  
328 research area to have reached gender parity in Colombia. Despite a general level of gender  
329 parity across different countries (Franco-Orozco & Franco-Orozco, 2018; Ramakrishnan et  
330 al., 2014; van den Besselaar & Sandstrom, 2017), women underrepresentation in the medical  
331 and health science could still be found at more senior positions, illustrating the ‘leaky  
332 pipeline phenomenon’ (Ramakrishnan et al., 2014). A decreasing representation of women in  
333 medical sciences, generally considered a gender equal field, highlights the need to implement  
334 initiatives that not only promote the participation of women in male-dominated research  
335 areas, but also secure the retention of women as they move upward to more senior rank  
336 levels.

337 Since it is expected that the average age of researchers increases at higher researcher rank  
338 levels, the lower average age in female researchers could reflect the lower representation of

339 women in the most senior research levels, signalling another potential impact of the ‘leaky  
340 pipeline phenomenon’ (Blickenstaff, 2005; Pell, 1996). However, lower age in women could  
341 also represent an opportunity to secure the retention of a younger population of female  
342 researchers, driving a future increase in the representation of women at more senior levels as  
343 they move upward across research ranks. Moreover, the underrepresentation of women as a  
344 proportion of scholarship awardees for doctoral studies and doctoral graduates indicate that  
345 the completion of doctoral studies might be a limiting factor influencing the loss of women  
346 beyond the junior researcher rank (Franco-Orozco & Franco-Orozco, 2018; Valentova et al.,  
347 2017; van den Besselaar & Sandstrom, 2017). Also, the lack of a significant correlation  
348 between female doctoral graduates and the percentage of female researchers indicate that  
349 retaining doctoral graduates is a key component to consider. Based on this, it can be  
350 hypothesised that a boost in the proportion of women with doctoral degrees in a younger  
351 population of female researchers could have a cascading effect, encouraging the participation  
352 and retention of women across ranks (Shen, 2013).

353 Based on data from the UIS, Colombia ranks 15th out of 20 Latin American countries with  
354 available data, sitting below the average of women participation in Latin America (45%),  
355 distant from countries like Bolivia (63%), Venezuela (62%) and Trinidad and Tobago (54%),  
356 countries with the highest percentage of women representation in science in the region  
357 (UNESCO Institute of Statistics, 2018). Considering the state of political and civil unrest that  
358 has prevailed over the last decades, it could be argued that the long-lasting internal armed  
359 conflict could be one of the main drivers influencing women participation in Colombian  
360 science (Daza & Bustos, 2008; Franco-Orozco & Franco-Orozco, 2018). It is estimated that  
361 3.5 million women were victims of the internal conflict (49.5% of the victims), and that  
362 between 2010-2015, more than 800,000 were victims of some kind of sexual violence (Cifelli  
363 & Diaz, 1989; International, 2017; Pérez, 2008). Moreover, data from 2000 from the United

364 Nations Development Program estimated that between 60-70% of Colombian women have  
365 suffered some kind of violence. According to the 2018 Global Peace Index report (ranking  
366 the intensity of the internal conflict of a country), Colombia ranks 145<sup>th</sup> of 163 countries  
367 studied (Institute for Economics and Peace, 2018). Nonetheless, comparing the percentage of  
368 women in science in Colombia with other countries with similar intensity of internal conflict,  
369 Colombia ranks 9<sup>th</sup> in 20 countries (Table 2), five points above the average for these  
370 countries (32.65%). This could indicate that despite the differential impact that war has on  
371 women's rights, internal conflict is not the only limiting factor leading to women  
372 underrepresentation in science, and so additional factors should also be considered.

373 R&D expenditure has been discussed as a potential driver of women underrepresentation in  
374 science (Ceci & Williams, 2011; Christie et al., 2017; van den Besselaar & Sandstrom, 2017).  
375 Despite an increase in the percentage of GDP invested in R&D between 2000 (0.13) and  
376 2013 (0.27) (World Bank, 2018), COLCIENCIAS has seen a steady decrease in its annual  
377 budget between 2013 (430,000 million COP) and 2018 (337,000 million COP)  
378 (COLCIENCIAS, 2017). The present results did show a significant correlation between  
379 women representation and R&D expenditure between 2000-2015, suggesting that the  
380 decrease in the annual budget of COLCIENCIAS since 2013 could have played a part in the  
381 decrease in the percentage of women in science in Colombia between 2012 and 2015. R&D  
382 expenditure in Colombia is below the average for Latin America and the Caribbean (0.7%)  
383 and is the lowest of the five countries with the highest scientific output in the region  
384 (UNESCO Institute of Statistics, 2018), which reinforces the need for an increase in R&D  
385 expenditure to tackle women underrepresentation in the future. Moreover, comparing the  
386 percentage of women in science in countries with similar R&D expenditure (0.21 to 0.36% of  
387 GDP), the percentage of women in science in Colombia is below average (39.69%, Table 3).



388 This informs the results above and suggests that the internal conflict and lack of funding are  
389 not the only decisive factors that could explain gender disparity in science in Colombia.

390 The legal framework ruling the institutional procedures that promote gender parity in science  
391 is also a major mechanism for the enhancement of women representation (Ceci & Williams,  
392 2011; Ceci et al., 2009; Pell, 1996). Recently, Colombia has made major steps towards  
393 ensuring the protection of women's rights, especially in the context of the internal armed  
394 conflict (Overseas Development Institute, 2015). Law 581 of 2000 established a minimum  
395 quota of 30% of women representation in government (Bustamante, 2007). A revised quota  
396 law was established in 2011 (law 1475 of 2011), extending the implementation of the 30%  
397 quota to the formation and operation of political parties and political movements  
398 (Bustamante, 2007). However, the impact of the measurable benefits derived from these laws  
399 is under debate (Batlle, 2016). A battery of additional laws has been established over the last  
400 decade, protecting the principle of gender equality, access to land and access to justice in  
401 cases of sexual violence. Nevertheless, despite the advancement in the protection of gender  
402 parity and women's rights, no legislation has been established governing the representation of  
403 women in science. As an attempt to promote, stimulate and highlight women participation  
404 science and technology in Colombia, the Colombian Network of Scientific Women (Red  
405 Colombiana de Mujeres Científicas) was created in 2015 (RCMC, 2015). Examples of  
406 legislation promoting gender parity in science can be drawn from countries such as Spain  
407 (Law 14 of 2011), the United States of America (the Promoting Women in Entrepreneurship  
408 Act and the INSPIRE Women Act), and the European Union (article 16 of the Regulation  
409 1291 of 2013 ruling the Horizon2020 program). Current discussions of science legislation in  
410 Colombia have focused on a proposal for the creation of a Ministry of Science, Technology  
411 and Innovation, by changing Law 1286 of 2009 (El Espectador, 2018a). This would elevate  
412 COLCIENCIAS from an administrative department under the National Planning Department

413 to an independent ministry. Beyond the discussion around the status of the institution,  
414 COLCIENCIAS has currently been under public scrutiny mainly due to the instability in its  
415 leadership, evidenced by the 10 directors that have been named since 2010 (El Espectador,  
416 2018b).

417 Assessing and controlling for unconscious bias is also crucial to diminish gender disparity in  
418 academia, as it addresses the cultural and psychological drivers of women  
419 underrepresentation (Ceci & Williams, 2011; Christie et al., 2017). Extensive evidence  
420 currently available on the sources of unconscious bias that impact the participation of women  
421 in science could be divided into two components: opposite gender exclusion and self-  
422 exclusion (Ceci & Williams, 2011; Christie et al., 2017). Opposite gender exclusion could be  
423 described as the result of a tendency to favour people of the same gender, leading to the  
424 unintentional exclusion of the opposite gender (Murray et al., 2018). This phenomenon has  
425 been reported equally for women and men in science (Murray et al., 2018). However, given  
426 the heavily male-dominated demographics of the STEMM workplace, women  
427 underrepresentation in science could be partly due to an exacerbated opposite gender  
428 exclusion. Implementing double-blind peer review and increasing gender and international  
429 diversity in review committees have been proposed to enhance the representation of  
430 minorities both in scientific publishing and in more senior institutional positions (Murray et  
431 al., 2018). Self-exclusion in science, on the other hand, can be viewed as the tendency to  
432 restrict oneself 's gender from involving in scientific activities, resulting from a variety of  
433 unconscious negative stereotypes (Moss-Racusin et al., 2012; Smeding, 2012).

434 Recent research has showed that negative gender stereotypes on intellectual prowess appear  
435 early during childhood, leading both boys and girls to consider men as more intelligent than  
436 women by age six (Bian et al., 2017). This early predisposition does not reflect a natural  
437 tendency in any way, as recent findings have found higher average academic grades for girls

438 than boys (O’Dea et al., 2018). The same study estimated gender parity in the top 10% of a  
439 STEMM-related class, and higher women representation in non-STEMM-related classes  
440 (O’Dea et al., 2018). Self-exclusion has also been reported in later stages of the academic  
441 career, in faculty members of different Science faculties at University level (Moss-Racusin et  
442 al., 2012). Both female and male faculty members showed a tendency to rate male students  
443 higher than female students, favouring higher salaries and mentoring for male applicants,  
444 leading to a lesser probability for female students to be hired (Moss-Racusin et al., 2012).  
445 Additionally, pre-existing bias was associated with less support for female students but did  
446 not associate with reactions to male students (Moss-Racusin et al., 2012). This suggests that  
447 unconscious bias is a major driver of women’s exclusion in science, both as a result of  
448 opposite gender exclusion and self-exclusion.

## 449 **Conclusions**

450 The results presented here elucidate the state of women participation in science across the 21<sup>st</sup>  
451 century, highlighting a generalised trend of women underrepresentation. Even though  
452 temporal trends show an increase in the percentage of women across all but one research area  
453 (i.e. medical and health science), greater efforts are needed to increase and retain gender  
454 parity across research fields. Initiatives to retain women in Colombian science should be of  
455 special focus for the medical and health science, as it is the only research area to both have  
456 reached gender parity and show a steady decrease in women representation since 2010. Given  
457 the lower percentage of female researchers in engineering, humanities and natural sciences,  
458 this should be areas of special focus for institutions in research and education. The lower  
459 average age of female researchers could represent an opportunity to address the ‘leaky-  
460 pipeline phenomenon’, ensuring that young female researchers are supported as they move  
461 upward to more senior research levels. Our results suggest that improving access to  
462 scholarships for doctoral studies, and the retention of female doctoral graduates in research,

463 could be major strategies to ensure the increase women representation in science in the  
464 future. Nonetheless, equal efforts should be made to improve the career prospects and  
465 working environment of Colombian women scientists in the present. This study also  
466 highlights the importance of long-term monitoring of demographic trends in science, in order  
467 to inform individual, institutional, governmental and global initiatives focused on increasing  
468 gender parity in STEMM. Following the increasing understanding of discrimination in  
469 science (Hughes, 2018; Pew Research Centre, 2018), future studies and discussion should  
470 also expand to evaluate representation of racial, ethnic and sexual minorities to inform the  
471 prevalence of minority discrimination in Colombian science. More and more refined data  
472 would allow more robust modelling techniques to be implemented in the estimates of  
473 temporal projections for gender parity, improving our predictive power. Consequently, the  
474 temporal projections presented here should be taken with caution as they are only a statistical  
475 representation of the data available. Without a greater overarching commitment to monitor  
476 and strengthen women representation in STEMM at a regional scale, not only in Colombia  
477 but globally, gender disparity could remain a critical issue that will plague science for  
478 decades and even centuries to come.

## 479 **Acknowledgments**

480 This work was inspired by countless Colombian female scientists who have endured the  
481 difficulties of an armed conflict, not only to challenge gender stereotypes and inspire other  
482 women to pursuit STEMM-related careers, but also to encourage male scientists to evaluate  
483 and reconsider our role in society and to defy our own stereotypes. Special thanks to Laura  
484 Castañeda-Gómez and Ana López-Aguirre for improving several early versions of the  
485 manuscript.

## 486 **References**

- 487 Amarasekara I, and Grant WJ. 2018. Exploring the YouTube science communication gender  
488 gap: A sentiment analysis. *Public Understanding of Science* 0:0963662518786654.  
489 10.1177/0963662518786654
- 490 Augusto C-N, Ole M, and Chrystian CS. 2017. Geographic overlaps between priority areas  
491 for forest carbon-storage efforts and those for delivering peacebuilding programs:  
492 implications for policy design. *Environmental Research Letters* 12:054014.
- 493 Baptiste B, Pinedo-Vasquez M, Gutierrez-Velez VH, Andrade GI, Vieira P, Estupiñán-  
494 Suárez LM, Londoño MC, Laurance W, and Lee TM. 2017. Greening peace in  
495 Colombia. *Nature Ecology & Evolution* 1:0102. 10.1038/s41559-017-0102
- 496 Batlle M. 2016. Mujeres en el Congreso colombiano: un análisis a partir de la primera  
497 implementación de la Ley de cuota de género en las elecciones de 2014. *Colombia*  
498 *Internacional* 89:17-49. 10.7440/colombiaint89.2017.01
- 499 Bernard RE, and Cooperdock EHG. 2018. No progress on diversity in 40 years. *Nature*  
500 *Geoscience* 11:292-295. 10.1038/s41561-018-0116-6
- 501 Bian L, Leslie S-J, and Cimpian A. 2017. Gender stereotypes about intellectual ability  
502 emerge early and influence children's interests. *Science* 355:389-391.  
503 10.1126/science.aah6524
- 504 Blickenstaff JC. 2005. Women and science careers: leaky pipeline or gender filter? *Gender*  
505 *and Education* 17:369-386. 10.1080/09540250500145072
- 506 Bustamante NR. 2007. Ley 581 de 2000, o ley de cuotas, ¿Ganamos o perdimos? *Opinión*  
507 *Jurídica* 6:87-114.
- 508 Canavire-Bacarreza G, Diaz-Gutierrez JE, and Hanauer MM. 2018. Unintended  
509 consequences of conservation: Estimating the impact of protected areas on violence in  
510 Colombia. *Journal of Environmental Economics and Management* 89:46-70.  
511 <https://doi.org/10.1016/j.jeem.2018.02.004>
- 512 Ceci SJ, and Williams WM. 2011. Understanding current causes of women's  
513 underrepresentation in science. *Proceedings of the National Academy of Sciences*  
514 108:3157-3162. 10.1073/pnas.1014871108

- 515 Ceci SJ, Williams WM, and Barnett SM. 2009. Women's underrepresentation in science:  
516 Sociocultural and biological considerations. *Psychological Bulletin* 135:218-261.  
517 10.1037/a0014412
- 518 Cho AH, Johnson SA, Schuman CE, Adler JM, Gonzalez O, Graves SJ, Huebner JR,  
519 Marchant DB, Rifai SW, Skinner I, and Bruna EM. 2014. Women are  
520 underrepresented on the editorial boards of journals in environmental biology and  
521 natural resource management. *PeerJ* 2:e542. 10.7717/peerj.542
- 522 Christie M, O'Neill M, Rutter K, Young G, and Medland A. 2017. Understanding why  
523 women are under-represented in Science, Technology, Engineering and Mathematics  
524 (STEM) within Higher Education: a regional case study. *Production* 27.  
525 10.1590/0103-6513.220516
- 526 Cifelli RL, and Diaz JG. 1989. New remains of *Prothoatherium columbianus* (Litopterna,  
527 Mammalia) from the Miocene of Colombia. *Journal of Vertebrate Paleontology*  
528 9:222-231. 10.1080/02724634.1989.10011756
- 529 COLCIENCIAS. 2016. Colombia BIO. Available at:  
530 <http://www.colciencias.gov.co/node/1768> (accessed on 21 September 2018).
- 531 COLCIENCIAS. 2017. La ciencia en cifras. Available at: [http://www.colciencias.gov.co/la-](http://www.colciencias.gov.co/la-ciencia-en-cifras)  
532 [ciencia-en-cifras](http://www.colciencias.gov.co/la-ciencia-en-cifras) (accessed on 10 April 2018).
- 533 Daza S, and Bustos TP. 2008. Contando mujeres. Una reflexión sobre los indicadores de  
534 género y ciencia en Colombia. *Revista de Antropología y Sociología* 10:29-51.
- 535 Débarre F, Rode NO, and Ugelvig LV. 2018. Gender equity at scientific events. *Evolution*  
536 *Letters* 2:148-158. 10.1002/evl3.49
- 537 Dutt K, Pfaff DL, Bernstein AF, Dillard JS, and Block CJ. 2016. Gender differences in  
538 recommendation letters for postdoctoral fellowships in geoscience. *Nature*  
539 *Geoscience* 9:805-808. 10.1038/ngeo2819
- 540 Elsevier. 2015. Gender in the Global Research Landscape. In: Elsevier, editor. p 96.
- 541 El Espectador. 2018a. El Ministerio de Ciencia, a un debate de ser realidad. Available at:  
542 [https://www.elespectador.com/noticias/ciencia/el-ministerio-de-ciencia-un-debate-de-](https://www.elespectador.com/noticias/ciencia/el-ministerio-de-ciencia-un-debate-de-ser-realidad-articulo-819753)  
543 [ser-realidad-articulo-819753](https://www.elespectador.com/noticias/ciencia/el-ministerio-de-ciencia-un-debate-de-ser-realidad-articulo-819753) (accessed on 23 October 2018).

- 544 El Espectador. 2018b. El fracaso estruendoso de Colciencias. *Available at:*  
545 [https://www.elespectador.com/opinion/editorial/el-fracaso-estruendoso-de-](https://www.elespectador.com/opinion/editorial/el-fracaso-estruendoso-de-colciencias-articulo-733023)  
546 [colciencias-articulo-733023](https://www.elespectador.com/opinion/editorial/el-fracaso-estruendoso-de-colciencias-articulo-733023) (accessed on 23 October 2018).
- 547 El Tiempo. 2017. 4.600 doctores colombianos se la juegan en el exterior. *Available at:*  
548 [https://www.eltiempo.com/datos/cuantos-colombianos-profesionales-hay-en-el-](https://www.eltiempo.com/datos/cuantos-colombianos-profesionales-hay-en-el-extranjero-139704)  
549 [extranjero-139704](https://www.eltiempo.com/datos/cuantos-colombianos-profesionales-hay-en-el-extranjero-139704) (accessed on 12 August 2018).
- 550 Evans TM, Bira L, Gastelum JB, Weiss LT, and Vanderford NL. 2018. Evidence for a mental  
551 health crisis in graduate education. *Nature Biotechnology* 36:282. 10.1038/nbt.4089
- 552 Franco-Orozco CM, and Franco-Orozco B. 2018. Women in Academia and Research: An  
553 Overview of the Challenges Toward Gender Equality in Colombia and How to Move  
554 Forward. *Frontiers in Astronomy and Space Sciences* 5. 10.3389/fspas.2018.00024
- 555 Holman L, Stuart-Fox D, and Hauser CE. 2018. The gender gap in science: How long until  
556 women are equally represented? *PLoS Biol* 16:e2004956.  
557 10.1371/journal.pbio.2004956
- 558 Hughes BE. 2018. Coming out in STEM: Factors affecting retention of sexual minority  
559 STEM students. *Science Advances* 4: eaao6373. 10.1126/sciadv.aao6373
- 560 Institute for Economics and Peace. 2018. Global Peace Index. Available at:  
561 <http://economicsandpeace.org> (accessed on 19 August 2018).
- 562 Jones TM, Fanson KV, Lanfear R, Symonds MR, and Higgie M. 2014. Gender differences in  
563 conference presentations: a consequence of self-selection? *PeerJ* 2:e627.  
564 10.7717/peerj.627
- 565 Kern CC, Kenefic LS, and Stout SL. 2015. Bridging the Gender Gap: The Demographics of  
566 Scientists in the USDA Forest Service and Academia. *BioScience* 65:1165-1172.  
567 10.1093/biosci/biv144
- 568 Ley TJ, and Hamilton BH. 2008. The Gender Gap in NIH Grant Applications. *Science*  
569 322:1472-1474. 10.1126/science.1165878
- 570 Meyer M, Cimpian A, and Leslie S-J. 2015. Women are underrepresented in fields where  
571 success is believed to require brilliance. *Frontiers in psychology* 6:235-235.  
572 10.3389/fpsyg.2015.00235

- 573 Moss-Racusin CA, Dovidio JF, Brescoll VL, Graham MJ, and Handelsman J. 2012. Science  
574 faculty's subtle gender biases favor male students. *Proceedings of the National*  
575 *Academy of Sciences* 109:16474-16479. 10.1073/pnas.1211286109
- 576 Murray D, Siler K, Larivière V, Chan WM, Collings AM, Raymond J, and Sugimoto CR.  
577 2018. Gender and international diversity improves equity in peer review. *bioRxiv*.  
578 10.1101/400515
- 579 National Academies of Sciences Engineering and Medicine. 2018. *Sexual Harassment of*  
580 *Women: Climate, Culture, and Consequences in Academic Sciences, Engineering,*  
581 *and Medicine*. Washington, DC: The National Academies Press.
- 582 O'Dea RE, Lagisz M, Jennions MD, and Nakagawa S. 2018. Gender differences in individual  
583 variation in academic grades fail to fit expected patterns for STEM. *Nature*  
584 *Communications* 9:3777. 10.1038/s41467-018-06292-0
- 585 Ocampo-Peñuela N, and Winton RS. 2017. Economic and Conservation Potential of Bird-  
586 Watching Tourism in Postconflict Colombia. *Tropical Conservation Science*  
587 10:1940082917733862. 10.1177/1940082917733862
- 588 OCyT. 2018. Science and Technology Indicators. Available at: <http://ocyt.org.co> (accessed  
589 on 15 October 2018).
- 590 Overseas Development Institute. 2015. Progress Despite Empowerment: Women's  
591 empowerment and conflict in Colombia. Available at:  
592 <https://www.odi.org/publications/9730-colombia-conflict-gender-equality> (accessed  
593 on 10 July 2018).
- 594 Ovseiko PV, Greenhalgh T, Adam P, Grant J, Hinrichs-Krapels S, Graham KE, Valentine  
595 PA, Sued O, Boukhris OF, Al Olaqi NM, Al Rahbi IS, Dowd A-M, Bice S, Heiden  
596 TL, Fischer MD, Dopson S, Norton R, Pollitt A, Wooding S, Balling GV, Jakobsen  
597 U, Kuhlmann E, Klinge I, Pololi LH, Jaggi R, Smith HL, Etkowitz H, Nielsen MW,  
598 Carrion C, Solans-Domènech M, Vizcaino E, Naing L, Cheok QHN, Eckelmann B,  
599 Simuyemba MC, Msiska T, Declich G, Edmunds LD, Kiparoglou V, Buchan AMJ,  
600 Williamson C, Lord GM, Channon KM, Surender R, and Buchan AM. 2016. A global  
601 call for action to include gender in research impact assessment. *Health research*  
602 *policy and systems* 14:50-50. 10.1186/s12961-016-0126-z



- 603 Oxfam International. 2017. Encuesta de prevalencia de violencia sexual en contra de las  
604 mujeres en el contexto del conflicto armado colombiano 2010-2015. *Available at:*  
605 <https://www.odi.org/publications/9730-colombia-conflict-gender-equality> (accessed  
606 on 10 July 2018).
- 607 Pell AN. 1996. Fixing the leaky pipeline: women scientists in academia. *Journal of Animal*  
608 *Science* 74:2843-2848. 10.2527/1996.74112843x
- 609 Pérez FE. 2008. Forced displacement among rural women in Colombia. *Latin American*  
610 *Perspectives* 35:29-40.
- 611 Pew Research Centre. 2018. Women and men in STEM often at odds over workplace equity.  
612 *Available at:* [www.pewsocialtrends.org](http://www.pewsocialtrends.org) (accessed on 19 August 2018).
- 613 Pohlhaus JR, Jiang H, Wagner RM, Schaffer WT, and Pinn VW. 2011. Sex differences in  
614 application, success, and funding rates for NIH extramural programs. *Academic*  
615 *medicine : journal of the Association of American Medical Colleges* 86:759-767.  
616 10.1097/ACM.0b013e31821836ff
- 617 Ramakrishnan A, Sambuco D, and Jagsi R. 2014. Women's participation in the medical  
618 profession: insights from experiences in Japan, Scandinavia, Russia, and Eastern  
619 Europe. *J Womens Health (Larchmt)* 23:927-934. 10.1089/jwh.2014.4736
- 620 RCMC. 2015. Red colombiana de mujeres científicas. *Available at*  
621 <https://redcolombianademujerescientificas.org/wp/inicio> (accessed on 10 November  
622 2018).
- 623 RICYT. 2018. Red de indicadores de ciencia y tecnología. *Available at*  
624 <http://www.ricyt.org/indicadores> (accessed on 14 April 2018).
- 625 Salazar A, Sanchez A, Villegas JC, Salazar JF, Ruiz Carrascal D, Sitch S, Restrepo JD,  
626 Poveda G, Feeley KJ, Mercado LM, Arias PA, Sierra CA, Uribe MdR, Rendón AM,  
627 Pérez JC, Murray Tortarolo G, Mercado-Bettin D, Posada JA, Zhuang Q, and Dukes  
628 JS. 2018. The ecology of peace: preparing Colombia for new political and planetary  
629 climates. *Frontiers in Ecology and the Environment* 16:525-531. 10.1002/fee.1950
- 630 Scimago. 2018. Scimago Country Ranks. *Available at:* <https://www.scimagojr.com> (accessed  
631 on 21 June 2018).
- 632 Shen H. 2013. Mind the gender gap. *Nature* 495: 22-24.

- 633 Sierra CA, Mahecha M, Poveda G, Álvarez-Dávila E, Gutierrez-Velez VH, Reu B, Feilhauer  
634 H, Anáya J, Armenteras D, Benavides AM, Buendia C, Duque Á, Estupiñan-Suarez  
635 LM, González C, Gonzalez-Caro S, Jimenez R, Kraemer G, Londoño MC, Orrego  
636 SA, Posada JM, Ruiz-Carrascal D, and Skowronek S. 2017. Monitoring ecological  
637 change during rapid socio-economic and political transitions: Colombian ecosystems  
638 in the post-conflict era. *Environmental Science & Policy* 76:40-49.  
639 <https://doi.org/10.1016/j.envsci.2017.06.011>
- 640 Smeding A. 2012. Women in Science, Technology, Engineering, and Mathematics (STEM):  
641 An Investigation of Their Implicit Gender Stereotypes and Stereotypes'  
642 Connectedness to Math Performance. *Sex Roles* 67:617-629. 10.1007/s11199-012-  
643 0209-4
- 644 Stirling A. 2007. A general framework for analysing diversity in science, technology and  
645 society. *Journal of The Royal Society Interface* 4:707-719. 10.1098/rsif.2007.0213
- 646 The Interacademy Partnership. 2015. Women for science: Inclusion and participation in  
647 academies in science. Available at: [http://www.interacademies.org/29832/-Women-](http://www.interacademies.org/29832/-Women-for-Science-Inclusion-and-Participation-in-Academies-of-Science)  
648 [for-Science-Inclusion-and-Participation-in-Academies-of-Science](http://www.interacademies.org/29832/-Women-for-Science-Inclusion-and-Participation-in-Academies-of-Science) (accessed on 15  
649 September 2018).
- 650 UNESCO Institute of Statistics. 2018. Women in Science. Available at:  
651 <http://uis.unesco.org/en/topic/women-science> (accessed on 10 April 2018).
- 652 Unidad de Víctimas. 2017. Mujeres y conflicto armado. Available at:  
653 [www.unidadvictimas.gov.co](http://www.unidadvictimas.gov.co) (accessed on 17 September 2018).
- 654 Valentova JV, Otta E, Silva ML, and McElligott AG. 2017. Underrepresentation of women in  
655 the senior levels of Brazilian science. *PeerJ* 5:e4000. 10.7717/peerj.4000
- 656 van den Besselaar P, and Sandstrom U. 2017. Vicious circles of gender bias, lower positions,  
657 and lower performance: Gender differences in scholarly productivity and impact.  
658 *PLoS ONE* 12:e0183301. 10.1371/journal.pone.0183301
- 659 van der Lee R, and Ellemers N. 2015. Gender contributes to personal research funding  
660 success in The Netherlands. *Proceedings of the National Academy of Sciences of the*  
661 *United States of America* 112:12349-12353. 10.1073/pnas.1510159112
- 662 Wadman M. 2018. Report details harassment by famed biologist. *Science* 361:316-317.  
663 10.1126/science.361.6400.316

664 World Bank. 2018. World Bank Open Data. *Available at:* <https://data.worldbank.org>  
665 (accessed on 12 June 2018).

666

667

668

669

670

671

672

673

674

675

676

677

678

679

680

681

682

683

684

685

686

687

688

689

690 **Table 1.** Results of linear regression modelling analysis of the interaction between female  
691 doctoral graduates and overall percentage of women in six different research areas.

| Research area              | df | F     | R <sup>2</sup> | P     |
|----------------------------|----|-------|----------------|-------|
| Agricultural science       | 8  | 0.924 | -0.008         | 0.364 |
| Medical and health science | 8  | 0.922 | -0.008         | 0.365 |
| Natural science            | 8  | 0.79  | -0.023         | 0.399 |
| Social science             | 8  | 1.74  | 0.075          | 0.223 |
| Humanities                 | 8  | 0.002 | -0.124         | 0.957 |
| Engineering                | 8  | 4.322 | 0.269          | 0.071 |

692

693

694

695

696

697

698

699

700

701

702

703

704

705

706

707

708

709

710

711

712 **Table 2.** Comparison of percentage of women participation in science between 20 countries  
713 with similar 2018 Global Peace Index.

| Country                  | % women in science | Peace Index |
|--------------------------|--------------------|-------------|
| Iraq                     | 40                 | 3.425       |
| Central African Republic | 42                 | 3.236       |
| Russia                   | 40                 | 3.16        |
| Sudan                    | 40                 | 3.155       |
| Ukraine                  | 45                 | 3.113       |
| Pakistan                 | 34                 | 3.079       |
| Turkey                   | 37                 | 2.898       |
| Nigeria                  | 23                 | 2.873       |
| Colombia                 | 38                 | 2.729       |
| Mali                     | 10                 | 2.686       |
| Venezuela                | 63                 | 2.642       |
| Egypt                    | 44                 | 2.632       |
| Palestine                | 23                 | 2.621       |
| Mexico                   | 33                 | 2.583       |
| Ethiopia                 | 13                 | 2.524       |
| Philippines              | 50                 | 2.512       |
| Chad                     | 5                  | 2.498       |
| Cameroon                 | 22                 | 2.484       |
| Iran                     | 28                 | 2.439       |
| Saudi Arabia             | 23                 | 2.417       |

714

715

716

717

718

719

720

721

722

723

724

725 **Table 3.** Comparison of percentage of women participation in science between countries with  
726 percentage of GDP destined to R&D between 0.21 and 0.36, based on data from World Bank  
727 (2018).

| Country                | % of women in science | R&D expenditure |
|------------------------|-----------------------|-----------------|
| Uruguay                | 50                    | 0.36            |
| Mozambique             | 29                    | 0.34            |
| Georgia                | 52                    | 0.32            |
| Mali                   | 10                    | 0.31            |
| Colombia               | 38                    | 0.29            |
| Eswatini               | 41                    | 0.27            |
| Armenia                | 52                    | 0.25            |
| Oman                   | 28                    | 0.25            |
| Pakistan               | 34                    | 0.25            |
| Venezuela              | 63                    | 0.25            |
| Bosnia and Herzegovina | 47                    | 0.22            |
| Bermuda                | 32                    | 0.22            |
| Uzbekistan             | 40                    | 0.21            |

728

729

730

731

732

733

734

735

736

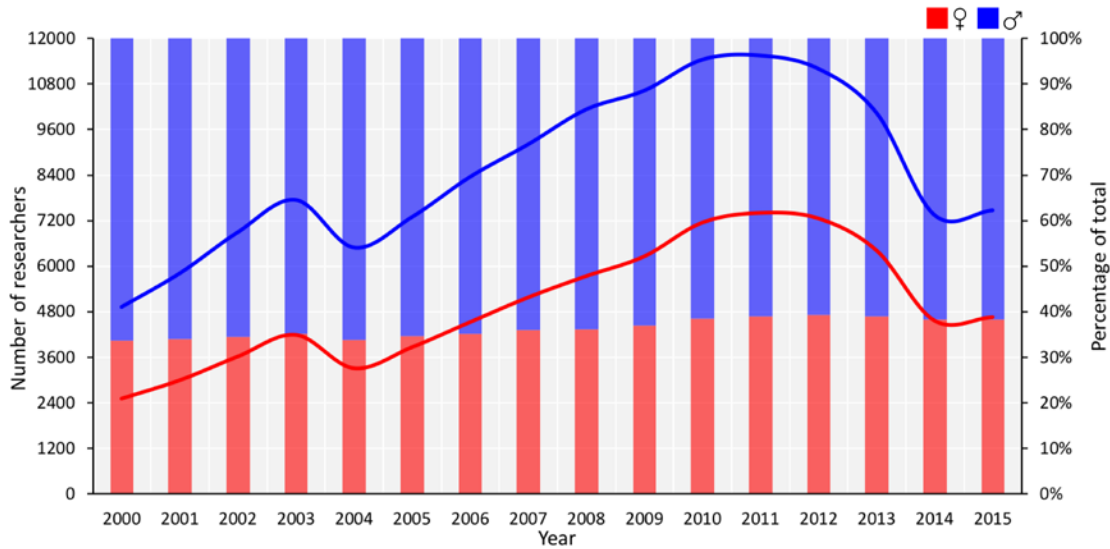

737

738 **Figure 1.** Women (red) and men (blue) participation in science in Colombia between 2000  
739 and 2015, represented as number of researchers (lines) and percentage of total researchers  
740 (bars).

741

742

743

744

745

746

747

748

749

750

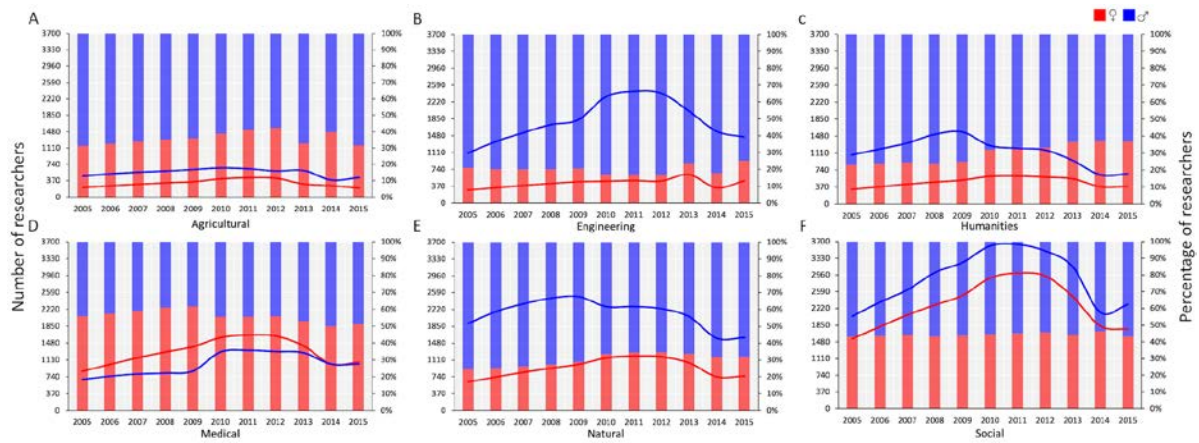

751

752 **Figure 2.** Women (red) and men (blue) participation in science in Colombia between 2000  
753 and 2015, represented as number of researchers (lines) and percentage of total researchers  
754 (bars). Results are divided into six different research fields: Agricultural (A), engineering (B),  
755 humanities (C), medical (D), natural (E), and social (F).

756

757

758

759

760

761

762



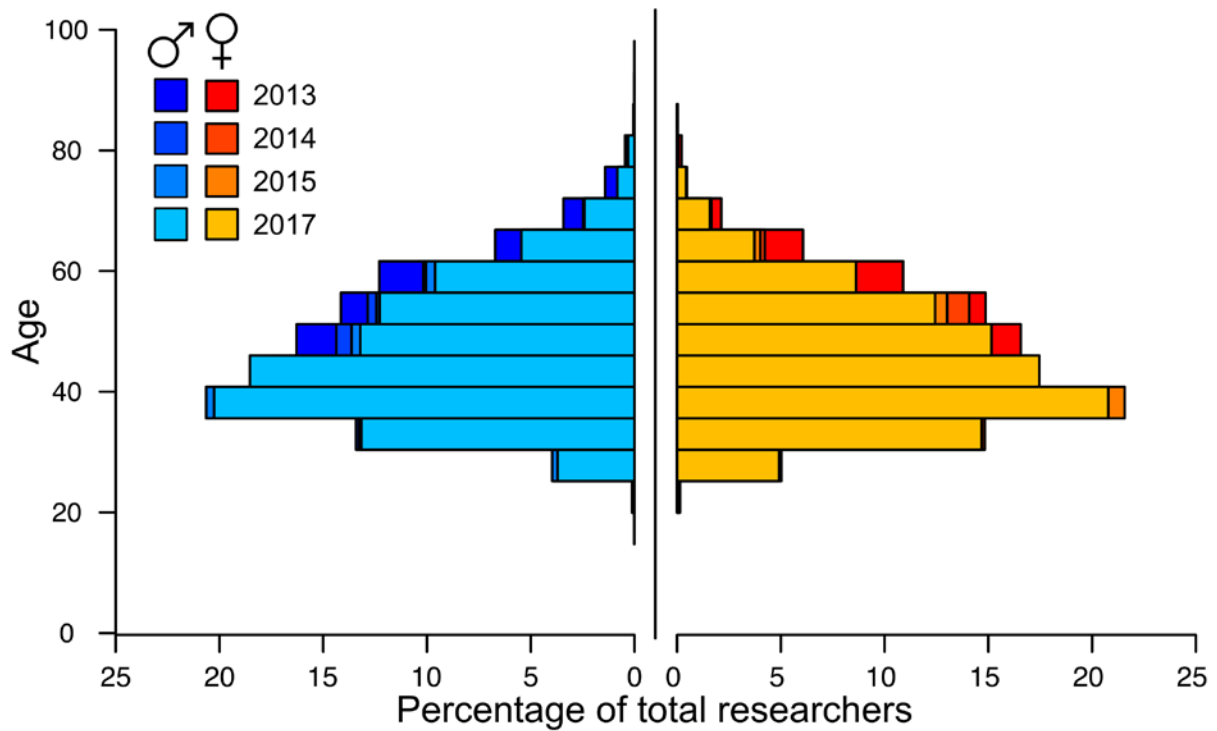

763

764 **Figure 3.** Age distribution of male (left) and female (right) researchers represented as  
765 percentage of total researchers of each gender per year, between 2013 and 2017. Shades of  
766 red-to-yellow (female) and blue-to-turquoise (blue) represent temporal changes in age  
767 distributions.

768

769

770

771

772

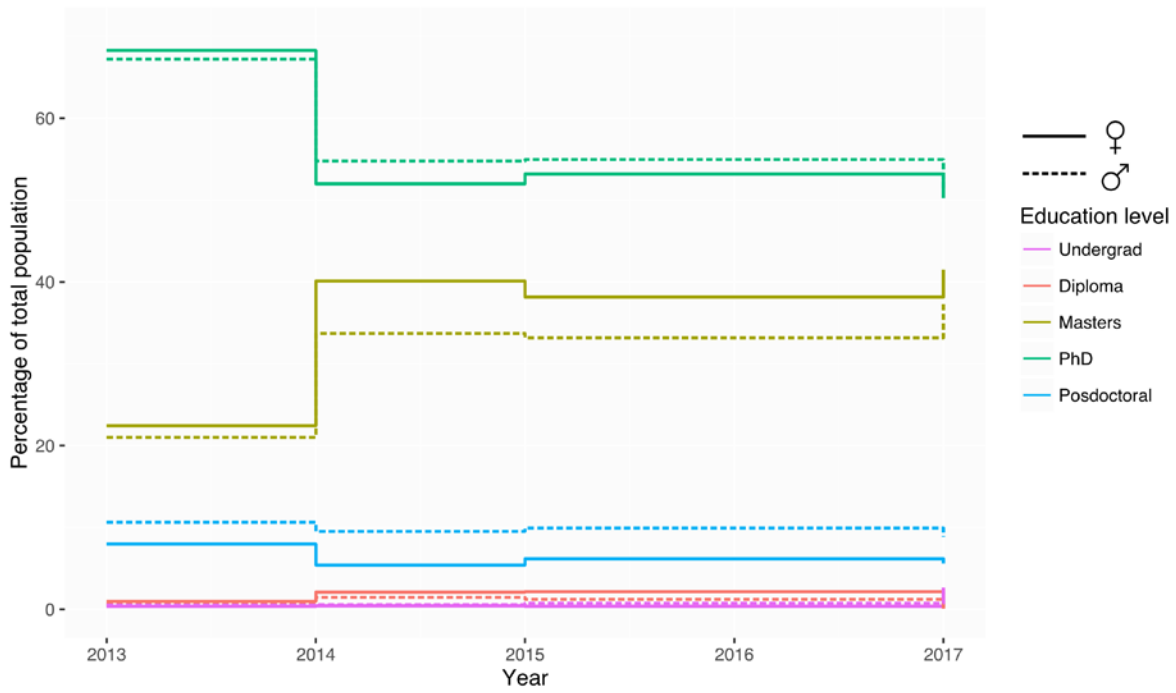

773

774 **Figure 4.** Temporal changes in the proportion of female (solid lines) and male (dashed lines)  
775 researchers with different education levels between 2013 and 2017.

776

777

778

779

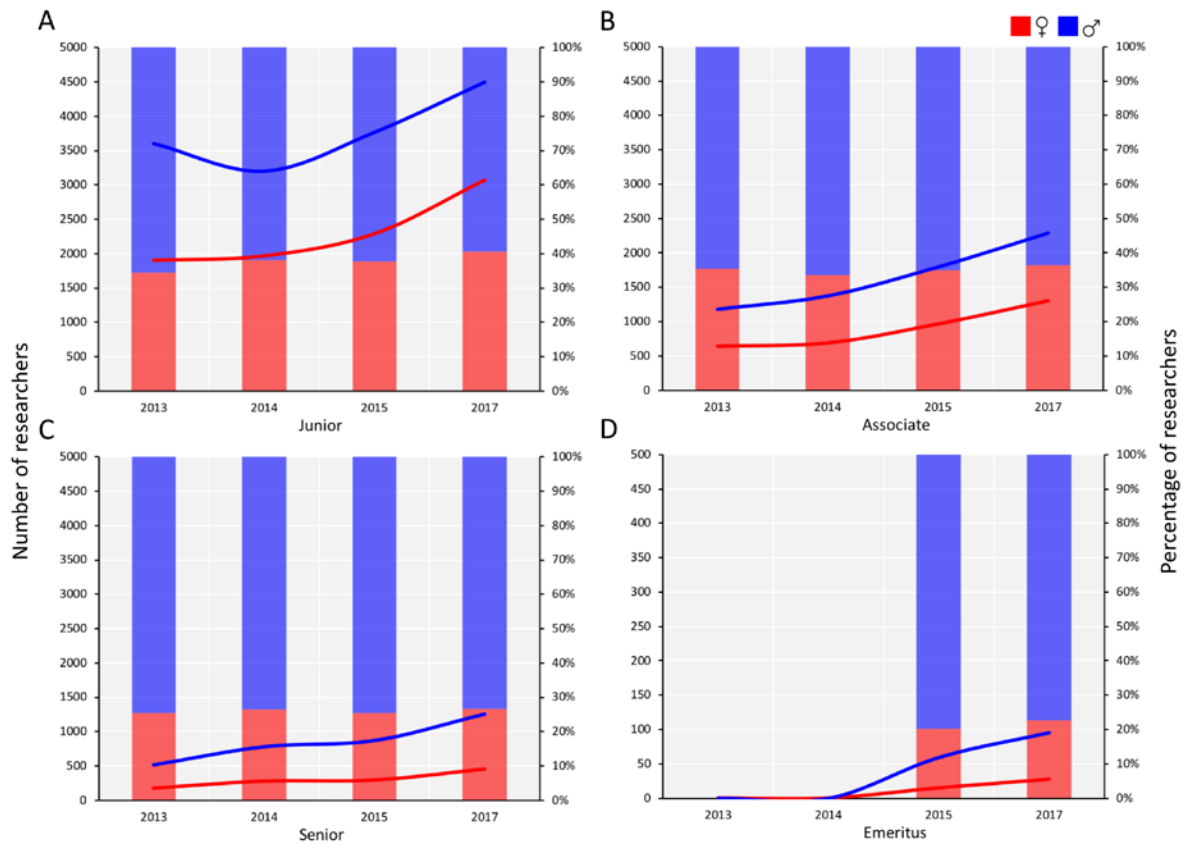

780

781 **Figure 5.** Female (red) and male (blue) representation across researcher rank levels in  
782 Colombia between 2000 and 2015, represented as number of researchers (lines) and  
783 percentage of total researchers (bars). Results are divided into six different research fields:  
784 Junior (A), associate (B), senior (C), and emeritus (D).

785

786

787

788

789

790

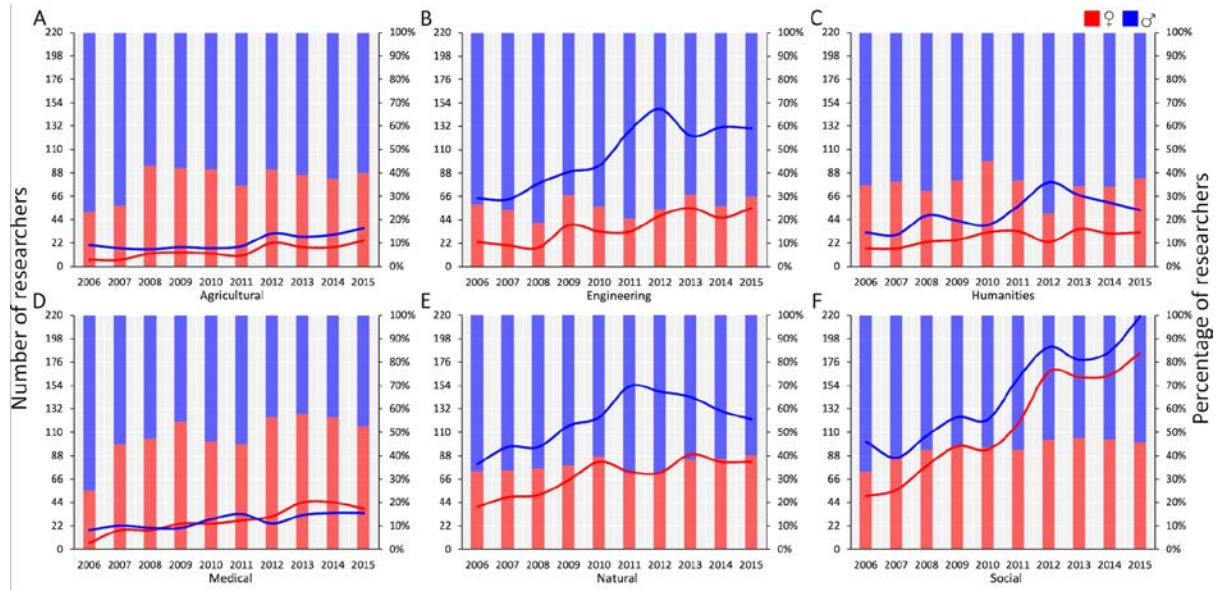

791

792 **Figure 6.** Female (red) and male (blue) representation in doctoral graduates in Colombia  
793 between 2000 and 2015, represented as number of researchers (lines) and percentage of total  
794 researchers (bars). Results are divided into six different research fields: Agricultural (A),  
795 engineering (B), humanities (C), medical (D), natural (E), and social (F).

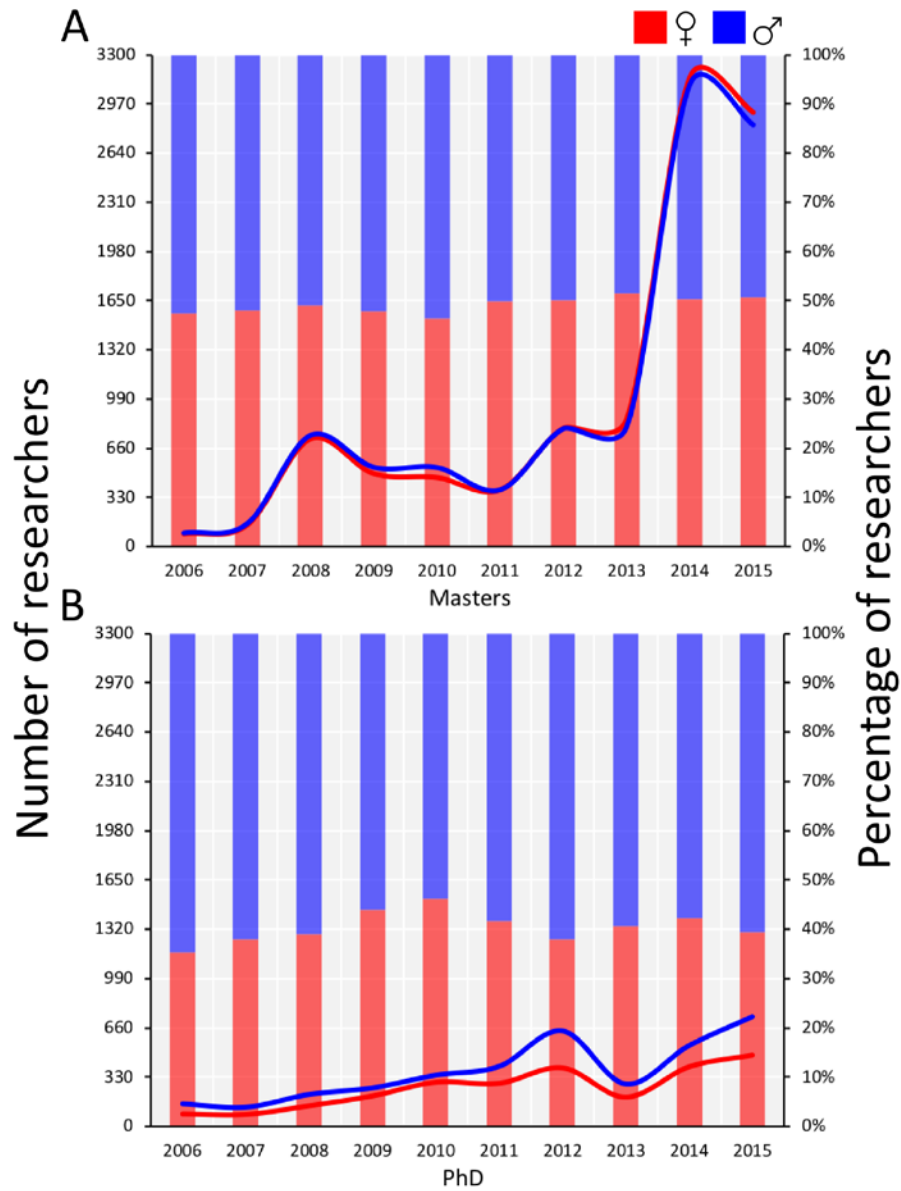

796

797 **Figure 7.** Women (red) and men (blue) access to scholarships for postgraduate studies in  
798 Colombia between 2000 and 2015, represented as number of scholarship awardees (lines) and  
799 percentage of total awardees (bars). Scholarships for masters' degrees (A) and doctoral  
800 studies (B).

801

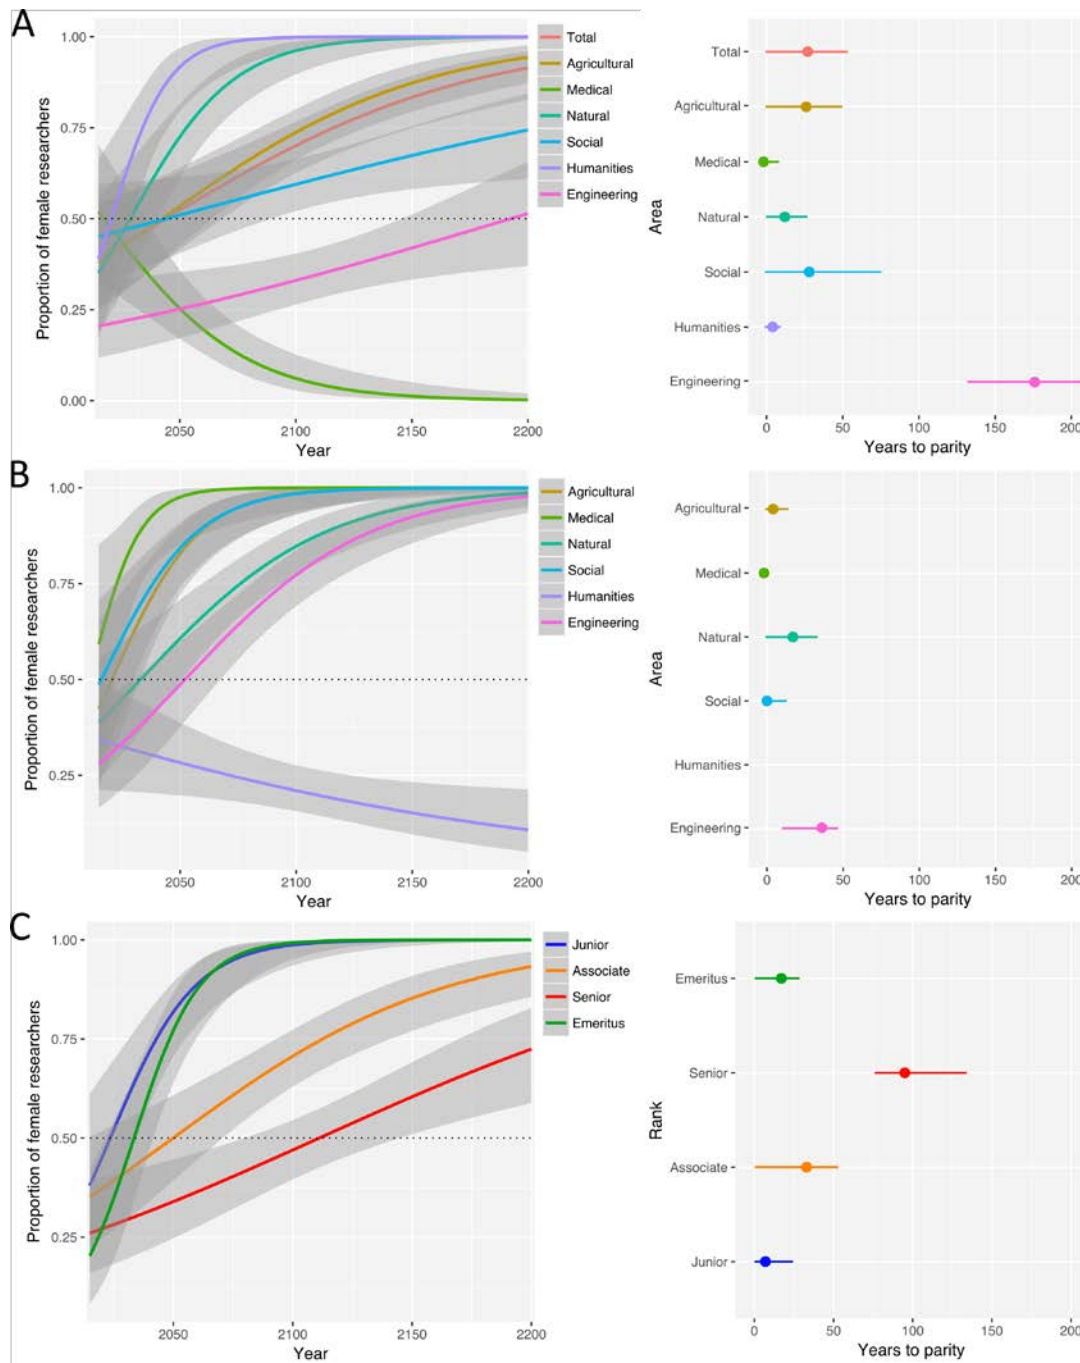

802

803 **Figure 8.** Temporal projections with 95% confidence intervals of women representation in  
804 science between 2000 and 2200 based on logistic function modelling using a binomial  
805 distribution, as a proportion of total researchers. Projections are represented as temporal  
806 trajectories of women representation (left column), and as the amount of years to parity from  
807 2018 (right column). Projections were made for the overall science workforce (A) and access  
808 to scholarships for postgraduate studies (B) for six different research fields, and overall  
809 science workforce across researcher rank levels (C).
